# Supplementary material for: The Role of Active or Passive Drainage after Evacuation of Chronic Subdural Hematoma: An Analysis of Two Randomized Controlled Trials (cSDH-Drain-Trial and TOSCAN Trial)
Source: MDPI journal article supplement (doi:10.3390/diagnostics12123045), 2022-12-05
Supplement: s1 [file s1]

**Supplementary Table S1: Baseline characteristics of both groups after propensity score matching for age and GCS at presentation**

| Drain group                              | Passive              | Active               | p-value          |
|------------------------------------------|----------------------|----------------------|------------------|
| n                                        | 192                  | 192                  |                  |
| Age (mean (SD))                          | 76.70 (9.67)         | 76.02 (10.29)        | 0.5              |
| Sex = male (%)                           | 131 (68.2)           | 119 (62.0)           | 0.239            |
| Drain type = subperiosteal (%)           | 104 (54.2)           | 102 (53.1)           | 0.918            |
| Drain duration (mean ( $\pm$ SD)), hours | 48.00 (0.00)         | 34.85 (11.47)        | <b>&lt;0.001</b> |
| Mobilization for 48 hours (%)            |                      |                      | <b>&lt;0.001</b> |
| Bed rest, flat                           | 192 (100.0)          | 4 (2.1)              |                  |
| Bed rest, 30°                            | 0 (0.0)              | 38 (20.3)            |                  |
| Partial mobilization                     | 0 (0.0)              | 66 (34.4)            |                  |
| Full mobilization                        | 0 (0.0)              | 89 (46.4)            |                  |
| GCS at presentation (median [IQR])       | 15.00 [14.00, 15.00] | 15.00 [14.00, 15.00] | 0.152            |
| mRS at presentation (median [IQR])       | 2.00 [1.00, 3.00]    | 2.00 [1.00, 2.00]    | <b>0.007</b>     |
| Aphasia = yes (%)                        | 38 (19.8)            | 51 (26.6)            | 0.147            |
| Motor deficit = yes (%)                  | 92 (47.9)            | 62 (32.3)            | <b>0.003</b>     |
| Headache = yes (%)                       | 63 (33.0)            | 111 (57.8)           | <b>&lt;0.001</b> |
| Incontinence = yes (%)                   | 4 (2.1)              | 6 (3.1)              | 0.749            |
| Seizure = yes (%)                        | 12 (6.2)             | 7 (3.6)              | 0.347            |
| Hypertension = yes (%)                   | 27 (14.1)            | 29 (15.1)            | 0.885            |
| CAD = yes (%)                            | 54 (28.1)            | 56 (29.2)            | 0.91             |
| Atrial fibrillation = yes (%)            | 42 (21.9)            | 53 (27.6)            | 0.237            |
| Stroke = yes (%)                         | 24 (12.5)            | 19 (9.9)             | 0.517            |
| COPD = yes (%)                           | 5 (2.6)              | 6 (3.1)              | 1                |
| Smoker = yes (%)                         | 8 (4.2)              | 8 (4.2)              | 1                |
| Alcohol = yes (%)                        | 12 (6.2)             | 4 (2.1)              | 0.074            |
| CAD = yes (%)                            | 54 (28.1)            | 56 (29.2)            | 0.91             |
| Blood thinner = yes (%)                  | 115 (59.9)           | 111 (57.8)           | 0.756            |
| MLS preoperative cm (mean ( $\pm$ SD))   | 0.72 (0.51)          | 0.75 (0.52)          | 0.509            |

mRS = modified Rankin Scale, MLS = midline shift, CAD = coronary artery disease, COPD = chronic obstructive pulmonary disease, GCS = Glasgow Coma Scale

**Supplementary Table S2: Outcome parameters of both groups after propensity score matching**

| Drain group                                                             | Passive              | Active               | p-value          |
|-------------------------------------------------------------------------|----------------------|----------------------|------------------|
| n                                                                       | 192                  | 192                  |                  |
| Recurrence = yes (%)                                                    | 30 (15.6)            | 51 (26.6)            | <b>0.012</b>     |
| Time to 1 <sup>st</sup> recurrence (days) (mean ( $\pm$ SD))            | 3.43 (12.82)         | 6.40 (17.17)         | 0.056            |
| Mortality = yes (%)                                                     | 8 (4.3)              | 15 (7.8)             | 0.844            |
| GCS after 24–48 hours (median [IQR])                                    | 15.00 [14.00, 15.00] | 15.00 [15.00, 15.00] | <b>&lt;0.001</b> |
| GCS after 4–6 weeks (median [IQR])                                      | 15.00 [15.00, 15.00] | 15.00 [15.00, 15.00] | <b>&lt;0.001</b> |
| GCS after 6–12 months (median [IQR])                                    | 15.00 [15.00, 15.00] | 15.00 [15.00, 15.00] | 0.21             |
| mRS after 4–6 weeks (median [IQR])                                      | 1.00 [0.00, 1.75]    | 1.00 [1.00, 2.00]    | <b>0.002</b>     |
| mRS after 6–12 months (median [IQR])                                    | 0.00 [0.00, 2.00]    | 1.00 [0.00, 2.00]    | 0.431            |
| MLS 24–48 hours postoperative (mean ( $\pm$ SD)), cm                    | 0.34 (0.27)          | 0.34 (0.34)          | 0.832            |
| MLS 4–6 weeks postoperative (mean ( $\pm$ SD)), cm                      | 0.08 (0.18)          | 0.16 (0.27)          | <b>0.006</b>     |
| Diameter of remaining hematoma after 24–48 hours (mean ( $\pm$ SD)), cm | 1.05 (0.54)          | 1.24 (0.59)          | <b>0.007</b>     |
| Diameter of remaining hematoma after 4–6 weeks (mean ( $\pm$ SD)), cm   | 0.55 (0.55)          | 0.72 (0.60)          | <b>0.020</b>     |
| Hemorrhagic complications = yes (%)                                     | 4 (2.1)              | 5 (2.6)              | 1                |
| Hemorrhage type (%)                                                     |                      |                      | 0.472            |
| EDH                                                                     | 1 (0.5)              | 0 (0.0)              |                  |
| ICB                                                                     | 3 (1.6)              | 5 (2.6)              |                  |
| Surgical Infection = yes (%)                                            | 9 (4.7)              | 3 (1.6)              | 0.143            |
| Medical complication (%)                                                |                      |                      | 0.143            |
| Deep vein thrombosis                                                    | 2 (1.0)              | 1 (0.5)              |                  |
| Pulmonary embolism                                                      | 2 (1.0)              | 0 (0.0)              |                  |
| Pneumonia                                                               | 3 (1.6)              | 0 (0.0)              |                  |

mRS = modified Rankin Scale, MLS = midline shift, cm = centimeter, W = weeks, M = months, EDH = Epidural hematoma, ICB = Intracerebral bleed, CSDH = chronic subdural hematoma, GCS = Glasgow Coma Scale

**Supplementary Table S3: Outcome parameters of both groups after excluding patients not on bed rest**

| Drain group                                                            | Passive              | Active               | p-value          |
|------------------------------------------------------------------------|----------------------|----------------------|------------------|
| n                                                                      | 220                  | 60                   |                  |
| Recurrence = yes (%)                                                   | 31 (14.1)            | 19 (31.7)            | <b>0.004</b>     |
| Time to 1 <sup>st</sup> recurrence, days (mean ( $\pm$ SD))            | 3.01 (12.02)         | 9.52 (20.54)         | <b>0.002</b>     |
| Mortality = yes (%)                                                    | 12 (5.7)             | 5 (8.3)              | 0.709            |
| GCS after 24–48 hours (median [IQR])                                   | 15.00 [14.00, 15.00] | 15.00 [15.00, 15.00] | <b>&lt;0.001</b> |
| GCS after 4–6 weeks (median [IQR])                                     | 15.00 [15.00, 15.00] | 15.00 [15.00, 15.00] | <b>0.002</b>     |
| GCS after 6–12 months (median [IQR])                                   | 15.00 [15.00, 15.00] | 15.00 [15.00, 15.00] | <b>0.017</b>     |
| mRS after 4–6 weeks (median [IQR])                                     | 1.00 [0.00, 2.00]    | 1.00 [0.00, 2.00]    | 0.184            |
| mRS after 6–12 months (median [IQR])                                   | 1.00 [0.00, 3.00]    | 1.00 [0.00, 2.00]    | 0.659            |
| MLS 24–48 hours postoperative (mean ( $\pm$ SD)), cm                   | 0.34 (0.28)          | 0.30 (0.35)          | 0.457            |
| MLS 4–6 weeks postoperative (mean ( $\pm$ SD)), cm                     | 0.09 (0.19)          | 0.18 (0.23)          | <b>0.022</b>     |
| Diameter of remaining hematoma after 24–48 hours (mean ( $\pm$ SD)) cm | 1.05 (0.54)          | 1.15 (0.51)          | 0.336            |
| Diameter of remaining hematoma after 4–6 weeks (mean ( $\pm$ SD)), cm  | 0.56 (0.57)          | 0.73 (0.64)          | 0.121            |
| Hemorrhagic complications = yes (%)                                    | 4 (1.8)              | 1 (1.7)              | 1                |
| Type of hemorrhage, postoperative (%)                                  |                      |                      | 0.859            |
| EDH                                                                    | 1 (0.5)              | 0 (0.0)              |                  |
| ICB                                                                    | 3 (1.4)              | 1 (1.7)              |                  |
| Surgical Infection = yes (%)                                           | 11 (5.0)             | 2 (3.3)              | 0.843            |
| Medical complication (%)                                               |                      |                      | 0.347            |
| Deep vein thrombosis                                                   | 2 (0.9)              | 2 (3.3)              |                  |
| Pulmonary embolism                                                     | 2 (0.9)              | 0 (0.0)              |                  |
| Pneumonia                                                              | 3 (1.64)             | 0 (0.0)              |                  |

mRS = modified Rankin Scale, MLS = midline shift, cm = centimeter, W = weeks, M = months, EDH = Epidural hematoma, ICB= Intracerebral bleed, CSDH = chronic subdural hematoma, GCS = Glasgow Coma Scale
